# Supplementary material for: Fc Effector Function Contributes to the Activity of Human Anti-CTLA-4 Antibodies
Source: PubMed Central journal article supplement (PMC5904288; doi:10.1016/j.ccell.2018.02.010), 2018-04-09
Supplement: mmc1.pdf [file mmc1.pdf]

## Supplemental Information

### **Fc Effector Function Contributes to the Activity of Human Anti-CTLA-4 Antibodies**

**Frederick Arce Vargas, Andrew J.S. Furness, Kevin Litchfield, Kroopa Joshi, Rachel Rosenthal, Ehsan Ghorani, Isabelle Solomon, Marta H. Lesko, Nora Ruef, Claire Roddie, Jake Y. Henry, Lavinia Spain, Assma Ben Aissa, Andrew Georgiou, Yien Ning Sophia Wong, Myles Smith, Dirk Strauss, Andrew Hayes, David Nicol, Tim O'Brien, Linda Mårtensson, Anne Ljungars, Ingrid Teige, Björn Frendeus, TRACERx Melanoma, TRACERx Renal, TRACERx Lung consortia, Martin Pule, Teresa Marafioti, Martin Gore, James Larkin, Samra Turajlic, Charles Swanton, Karl S. Peggs, and Sergio A. Quezada**

**Table S1, related to Figure 1.** Demographics and clinical characteristics of patients with advanced malignant melanoma (MM), non-small cell lung cancer (NSCLC) and renal cell carcinoma (RCC).

| Identifier           | Age | Sex | Subtype        | Stage    | Biopsy/<br>resection site | Mutational<br>status   | Current therapy | Previous therapy                                       |
|----------------------|-----|-----|----------------|----------|---------------------------|------------------------|-----------------|--------------------------------------------------------|
| <b>Melanoma</b>      |     |     |                |          |                           |                        |                 |                                                        |
| MM1                  | 53  | M   | Cutaneous      | IIIc     | LN                        | BRAF WT<br>NRAS mutant | Nil             | Adjuvant<br>ipilimumab/nivolumab                       |
| MM2                  | 52  | M   | Cutaneous      | IV – M1c | Small bowel               | BRAF mutant            | Pembrolizumab   | Ipilimumab                                             |
| MM3                  | 76  | F   | Cutaneous      | IV – M1c | Small bowel               | BRAF WT<br>NRAS mutant | Nil             | Nil                                                    |
| MM4                  | 76  | M   | Cutaneous      | IIIc     | LN                        | BRAF mutant            | Nil             | Nil                                                    |
| MM5                  | 74  | F   | Cutaneous      | IV – M1a | LN                        | BRAF WT                | Nil             | Nil                                                    |
| MM6                  | 61  | M   | Cutaneous      | IV – M1a | LN                        | BRAF WT                | Nil             | Ipilimumab                                             |
| MM7                  | 42  | M   | Cutaneous      | IIIc     | LN                        | BRAF mutant            | Nil             | Nil                                                    |
| MM8                  | 49  | M   | Cutaneous      | IV – M1c | LN                        | BRAF WT<br>NRAS mutant | Nil             | Paclitaxel + Trametinib<br>Ipilimumab<br>Pembrolizumab |
| <b>NSCLC</b>         |     |     |                |          |                           |                        |                 |                                                        |
| NSCLC1<br>(CRUK0394) | 74  | M   | Adenocarcinoma | Ila      | Right lower lobe          | -                      | Nil             | Nil                                                    |
| NSCLC2<br>(CRUK0400) | 76  | M   | Squamous       | IIIa     | Right upper lobe          | -                      | Nil             | Nil                                                    |
| NSCLC3<br>(CRUK0381) | 53  | F   | Squamous       | Ila      | Left upper lobe           | -                      | Nil             | Nil                                                    |
| NSCLC4<br>(CRUK0403) | 90  | M   | Squamous       | Ila      | Left lower lobe           | -                      | Nil             | Nil                                                    |
| NSCLC5<br>(CRUK0178) | 60  | M   | Adenocarcinoma | Ila      | Left upper lobe           | -                      | Nil             | Nil                                                    |
| NSCLC6<br>(CRUK0009) | 57  | M   | Adenocarcinoma | IIb      | Left lower Lobe           | -                      | Nil             | Nil                                                    |
| NSCLC7<br>(CRUK0230) | 54  | F   | Adenocarcinoma | Ila      | Right upper lobe          | -                      | Nil             | Nil                                                    |
| NSCLC8               | 69  | M   | Adenocarcinoma | Ia       | Left lower lobe           | -                      | Nil             | Nil                                                    |

| Identifier | Age | Sex | Subtype                                 | Stage | Biopsy/<br>resection site | Mutational<br>status | Current therapy | Previous therapy |
|------------|-----|-----|-----------------------------------------|-------|---------------------------|----------------------|-----------------|------------------|
| <b>RCC</b> |     |     |                                         |       |                           |                      |                 |                  |
| RCC1       | 44  | M   | Clear cell                              | III   | -                         | -                    | Nil             | Nil              |
| RCC2       | 69  | M   | Clear cell                              | Ila   | -                         | -                    | Nil             | Nil              |
| RCC3       | 78  | F   | Mixed - clear cell/<br>tubulo-papillary | Ia    | -                         | -                    | Nil             | Nil              |
| RCC4       | 65  | F   | Clear cell                              | IV    | -                         | -                    | Nil             | Nil              |
| RCC5       | 50  | F   | Clear cell                              | IV    | -                         | -                    | Nil             | Nil              |
| RCC6       | 60  | F   | Clear cell                              | IV    | -                         | -                    | Nil             | Nil              |
| RCC7       | 19  | F   | Clear cell                              | IV    | -                         | -                    | Nil             | Nil              |
| RCC8       | 59  | M   | Clear cell                              | IV    | -                         | -                    | Nil             | Nil              |

M, male; F, female; LN, lymph node; WT, wild type.

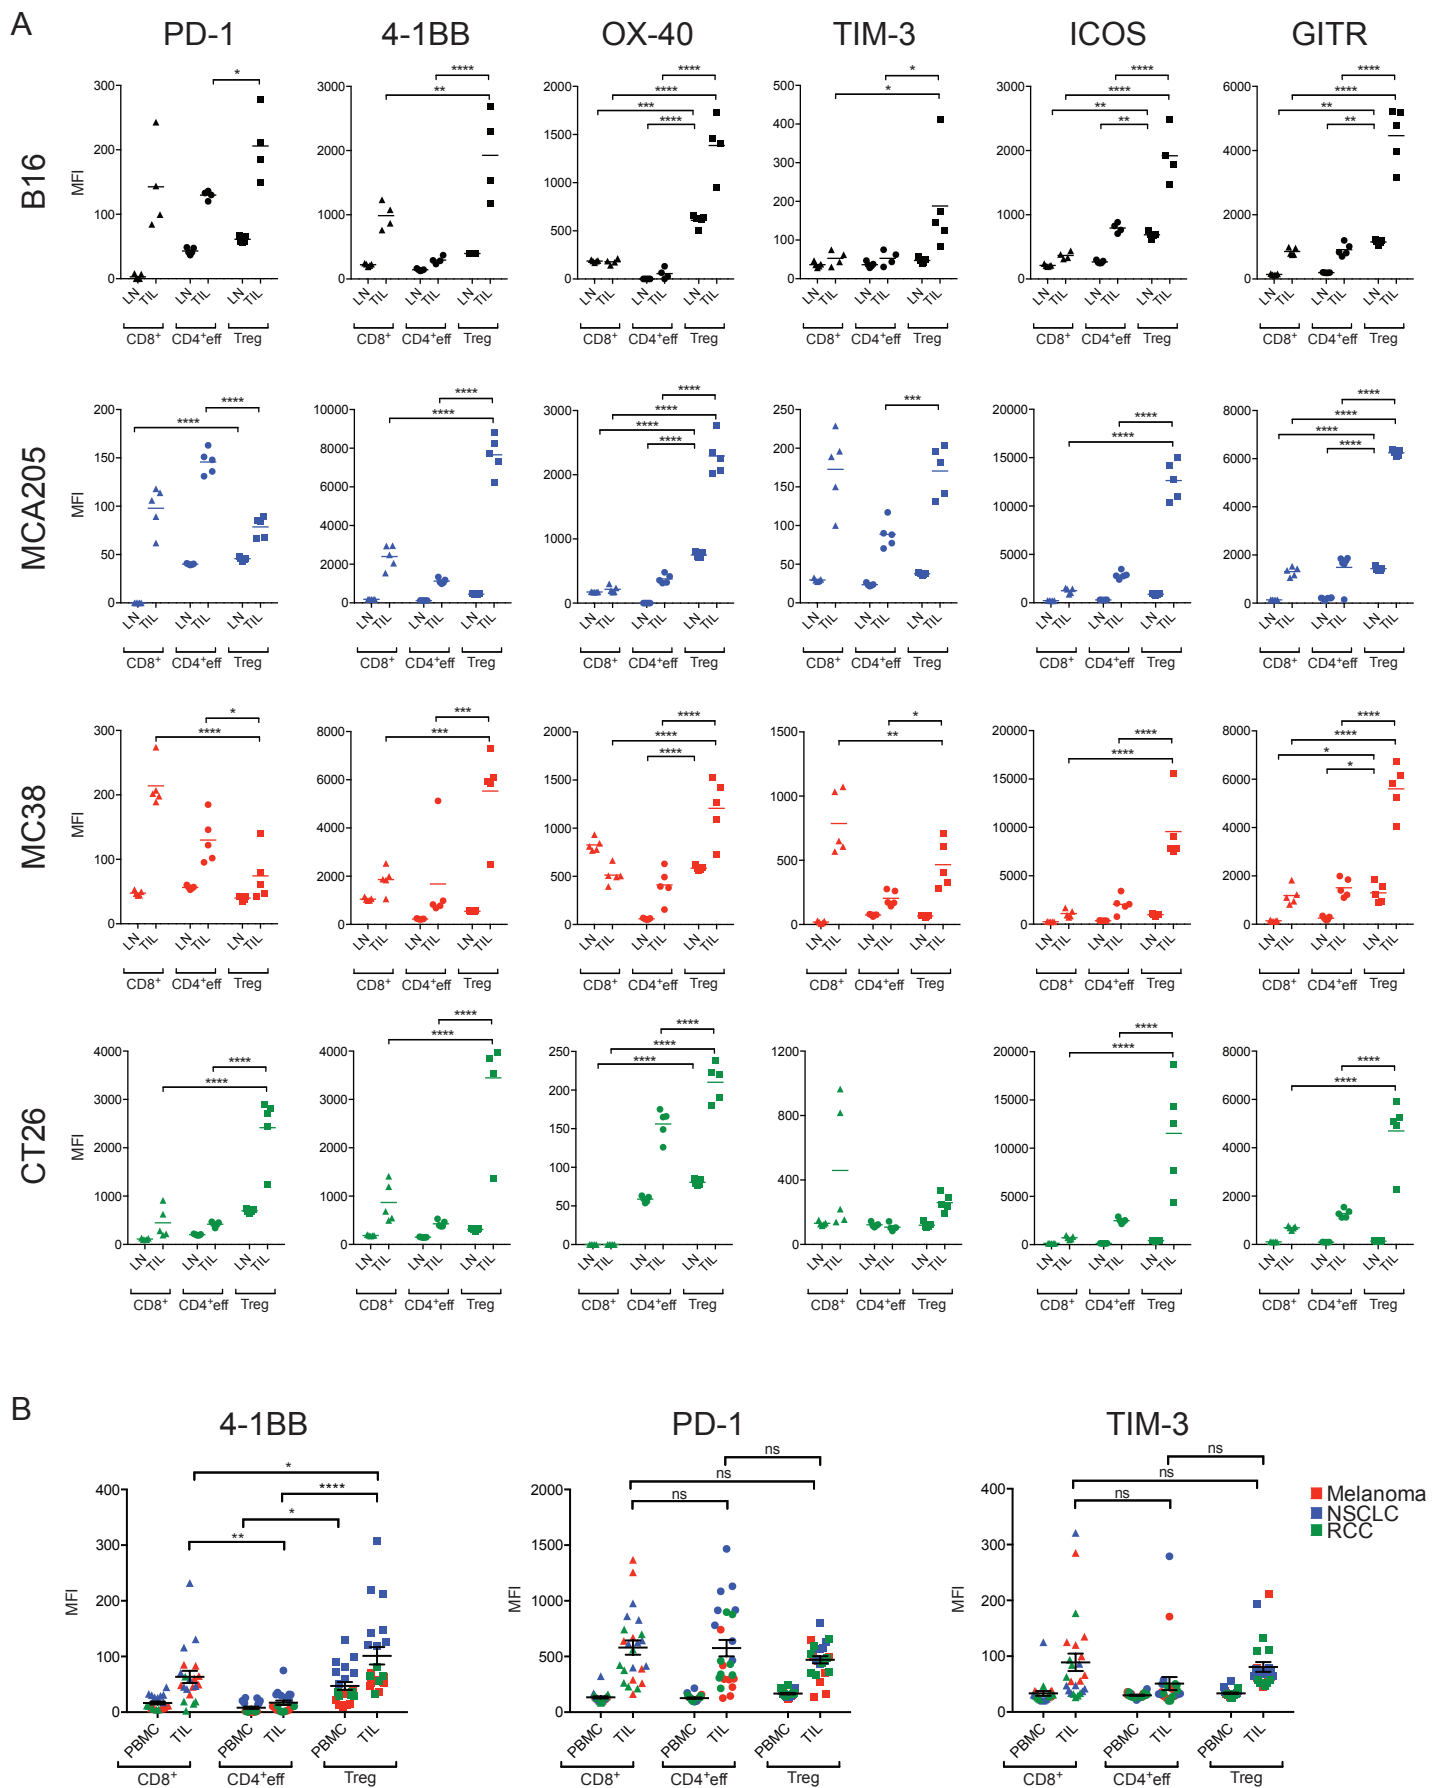

**A**

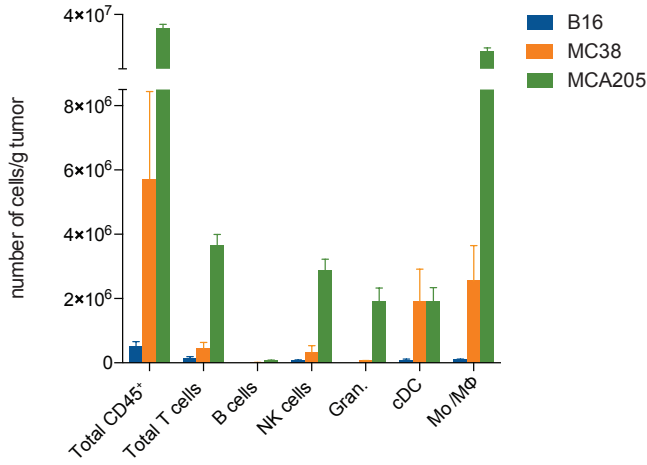

**B**

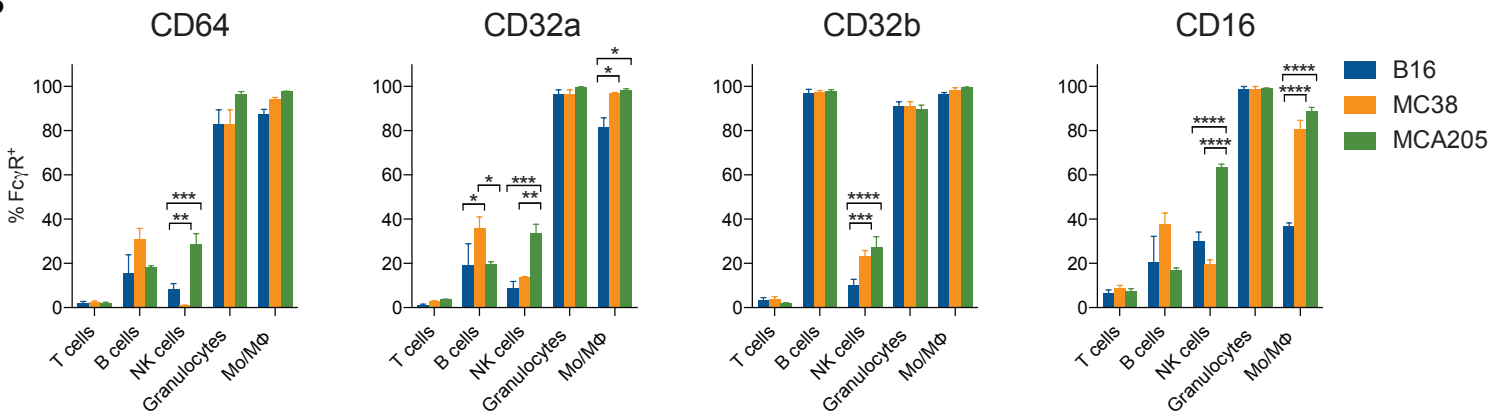

**C**

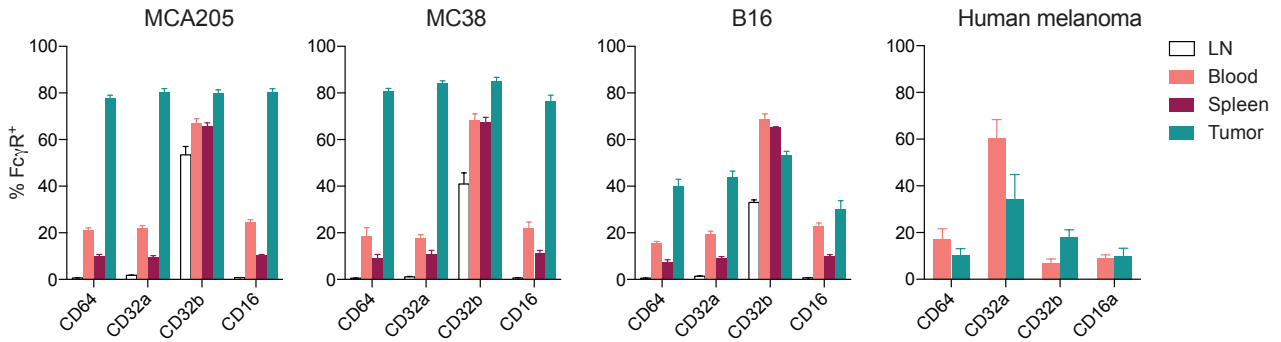

**Figure S2, related to Figure 2. Expression profile of hFcγRs in hFcγR mice and human tumors.** (A) Quantification of the absolute number of tumor-infiltrating leukocyte subpopulations in B16, MC38 and MCA205 tumors in hFcγR mice. (B) Percentage of expression of individual FcγRs in tumor-infiltrating leukocyte subpopulations in each tumor model. (C) Percentage of expression of individual FcγRs in total CD45<sup>+</sup> cells from different organs and tissues in tumor-bearing mice or samples from patients with melanoma (see Table S2). Error bars show ± SEM.

**Table S2, related to Figure 2.** Demographics and clinical characteristics of patients with advanced malignant melanoma (MM) employed fresh for myeloid analyses.

| Identifier | Age | Sex | Subtype   | Stage  | Biopsy site        | Mutational status | Current therapy | Previous therapy                  |
|------------|-----|-----|-----------|--------|--------------------|-------------------|-----------------|-----------------------------------|
| MM9        | 66  | M   | Cutaneous | IV M1c | LN                 | BRAF WT           | Pembrolizumab   | Ipilimumab                        |
| MM10       | 60  | M   | Ocular    | IV M1c | Splenic metastasis | BRAF WT           | Nil             | Nil                               |
| MM11       | 76  | M   | Cutaneous | IV M1c | SC                 | BRAF mutant       | Nil             | Nil                               |
| MM12       | 86  | F   | Cutaneous | IV M1c | SC<br>LN           | BRAF WT           | Nil             | Nil                               |
| MM13       | 46  | F   | Cutaneous | IV M1c | SC                 | BRAF mutant       | Nil             | Dabrafenib/Trametinib             |
| MM14       | 50  | M   | Cutaneous | IV M1c | Small bowel        | BRAF mutant       | Pembrolizumab   | Ipilimumab                        |
| MM15       | 69  | M   | Cutaneous | IV M1c | SC                 | BRAF WT           | Pembrolizumab   | Ipilimumab                        |
| MM16       | 76  | F   | Cutaneous | IV M1c | Small bowel        | BRAF WT           | Nil             | Nil                               |
| MM17       | 53  | M   | Cutaneous | IIIc   | LN                 | BRAF WT           | Nil             | Adjuvant ipilimumab/<br>nivolumab |

M, male; F, female; LN, lymph node; SC, subcutaneous; WT, wild type.

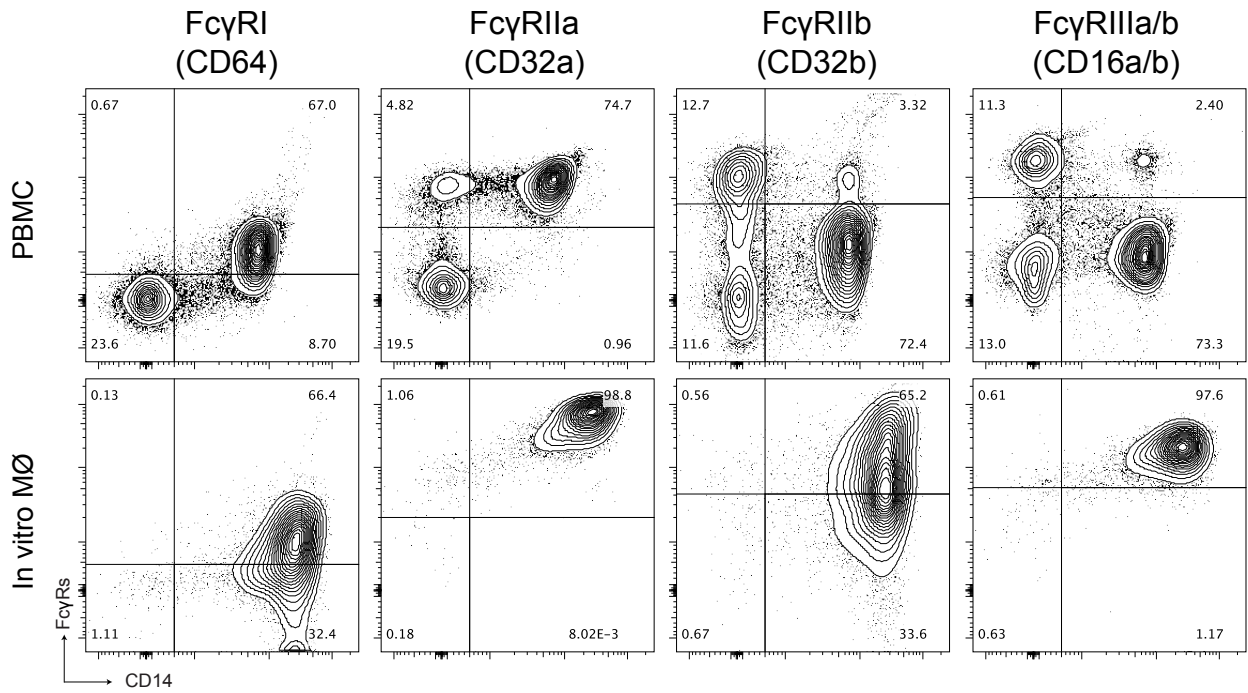

**Figure S3, related to Figure 3. Expression pattern of FcγRs in monocyte-derived human macrophages.** Expression of human FcγRs quantified by flow cytometry in CD14<sup>+</sup> bead-sorted monocytes from healthy donor PBMCs (upper panel) and matched macrophages (MΦ) seven days after in vitro differentiation with human recombinant M-CSF (lower panel).

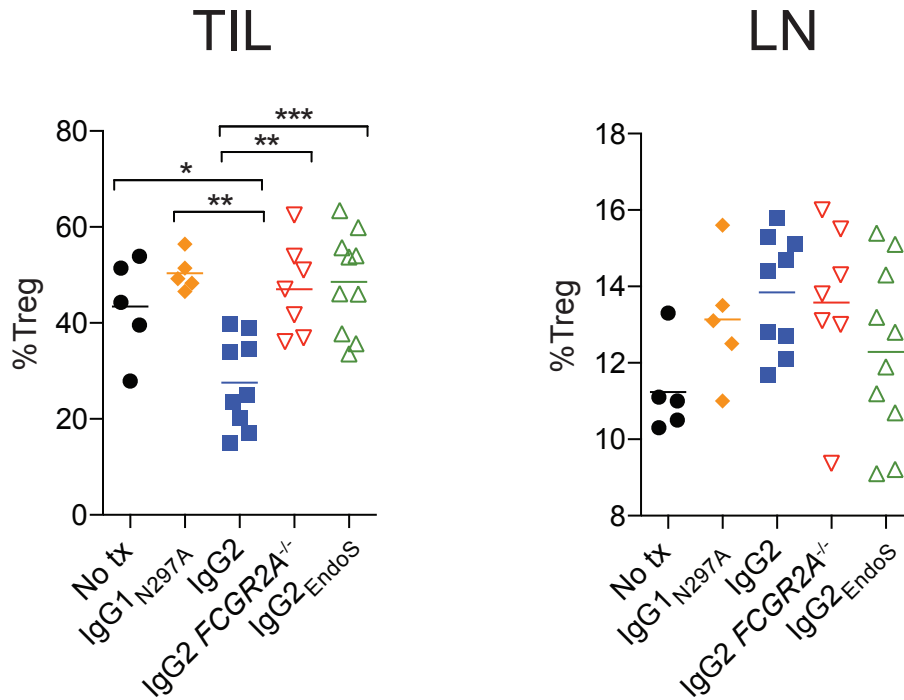

**Figure S4, related to Figure 4. In vivo intra-tumoral Treg cell depletion by anti-CTLA-4-hIgG2 depends on CD32a.** Percentage of CD4<sup>+</sup>FoxP3<sup>+</sup> T cells of total CD4<sup>+</sup> T cells in TIL and LN in hFcγR mice bearing MCA205 tumors and treated with different IgG variants of anti-CTLA-4 mAbs as described in Figure 4. In the *FCGR2A*<sup>-/-</sup> group, mice expressed all human FcγRs except CD32a. IgG2<sub>EndoS</sub>, endoglycosidase-treated IgG2 mAb. Horizontal bars show the mean.



A

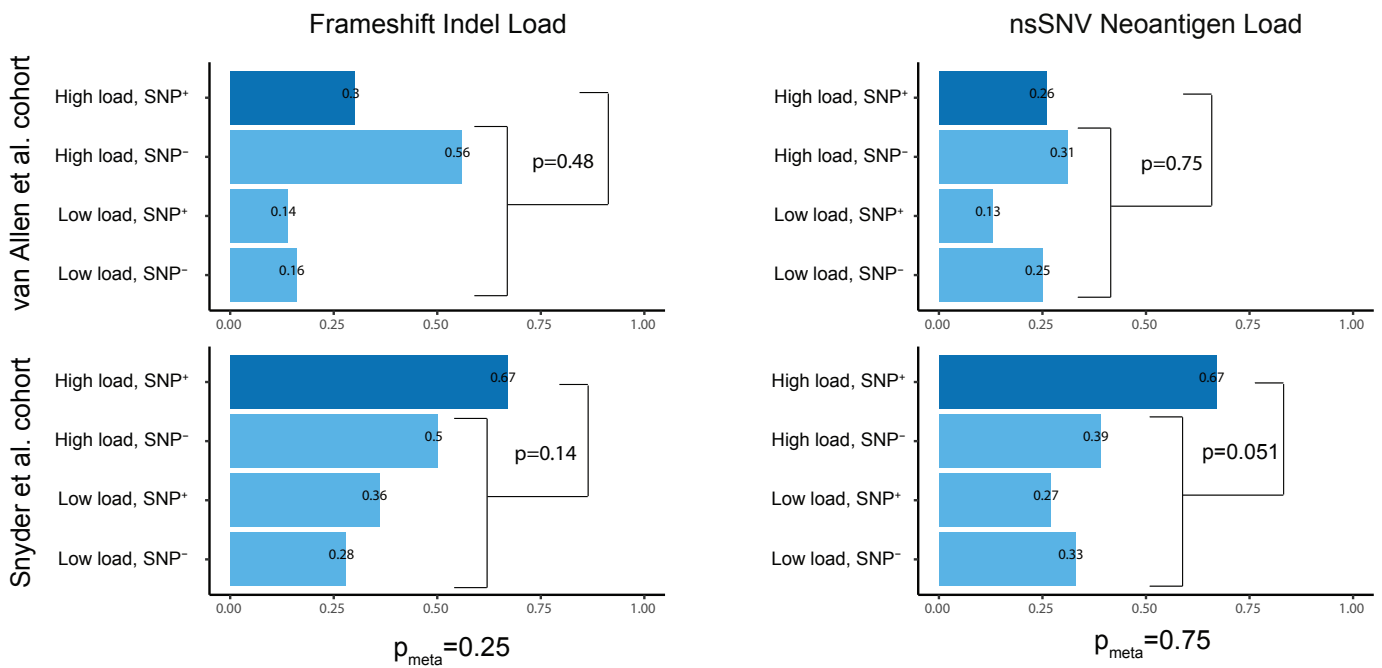

B

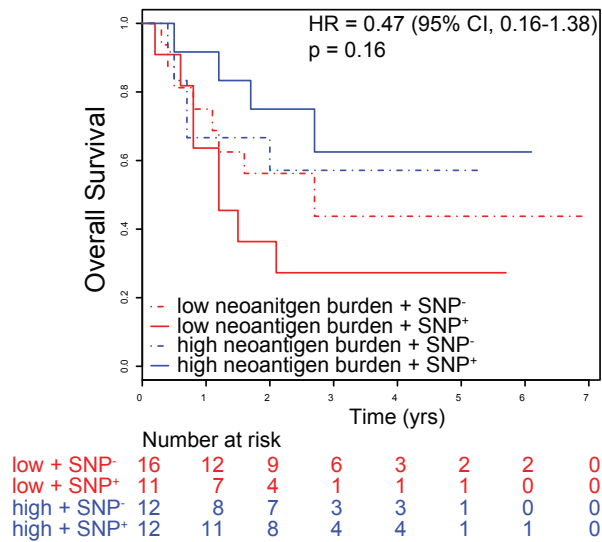

C

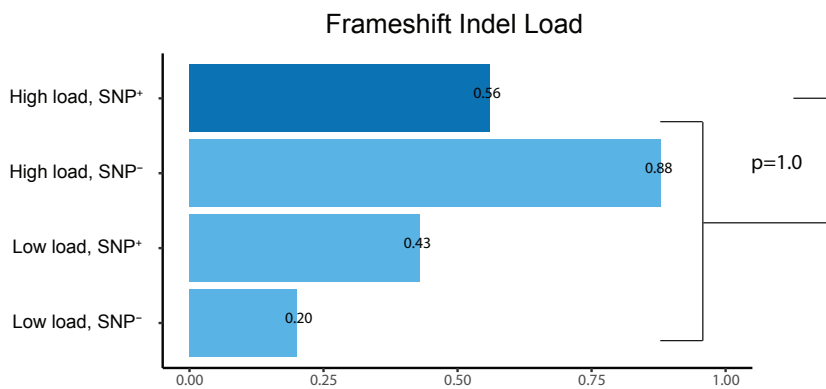

**Figure S5, related to Figure 5. Human FcγR polymorphisms impact upon response to ipilimumab in patients with advanced melanoma.** (A) Anti-CTLA-4 response rate in the van Allen et al. and Snyder et al. patient cohorts based on indel mutational load and nsSNV neoantigen load combined with the presence (SNP<sup>+</sup>) or absence (SNP<sup>-</sup>) of the germline CD32a-H131R high affinity SNP. (B) Survival analysis of the Snyder et al. patient cohort based on nsSNV neoantigen burden and germline CD32a-H131R SNP. (C) Response rate of patients treated with anti-PD-1 from the Hugo et al. dataset based on indel mutational load with (SNP<sup>+</sup>) or without (SNP<sup>-</sup>) the CD16-V158F high affinity SNP.
